# Supplementary material
Source: PubMed Central journal article supplement (PMC4198381)
Supplement: supp_217.20.3656_JEB109462.pdf [file supp_217.20.3656_JEB109462.pdf]

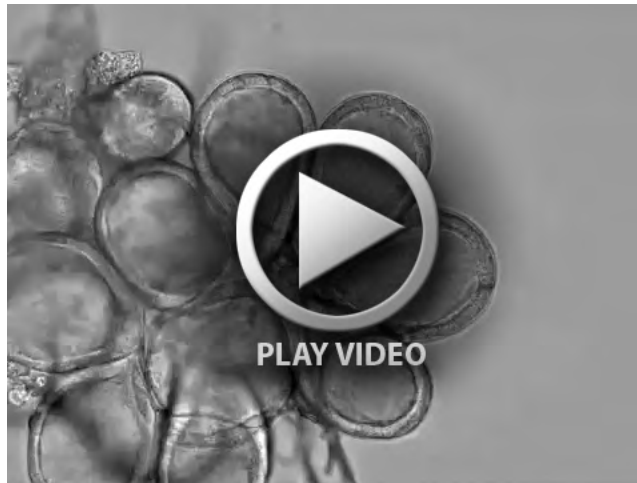

**Movie 1.** Dopamine triggers acini size increases in the salivary gland of the blacklegged tick, *Ixodes scapularis*. The movie is in 30x speed.

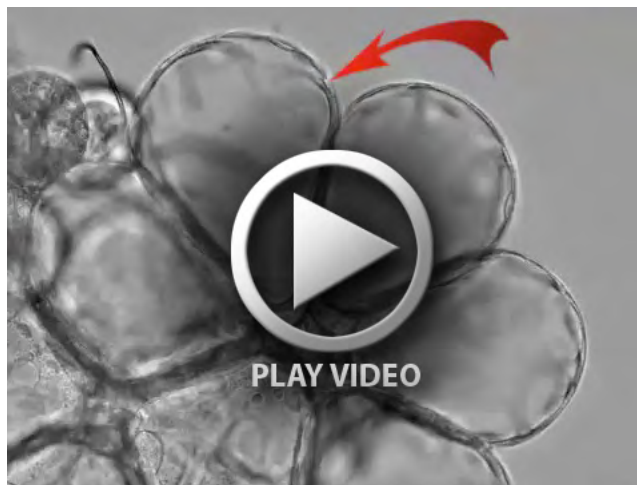

**Movie 2.** Pumping action of an acinus (indicated by arrow) in the salivary gland of the blacklegged tick, *Ixodes scapularis*. The movie is in real time with 1 frame captured per second.

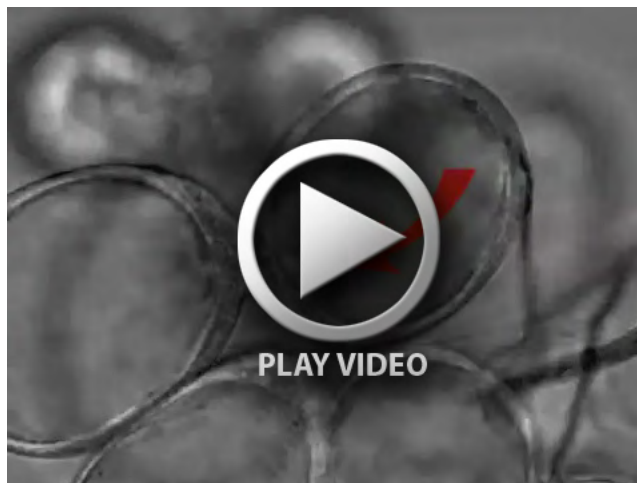

**Movie 3.** Gating action of an acinus in the salivary gland of the blacklegged tick, *Ixodes scapularis*. The periodic movement of acinar valve flaps is indicated by arrow. The movie is in 30x speed.
